# Supplementary material
Source: publisher figshare collection journal article supplement (https://diabetesjournals.figshare.com/ndownloader/files/23231609)
Supplement: Supplementary file 1 [file 23231609]

Supplementary Materials:

**Figure S1.** ADFE compliance rates: pre- & post-intervention

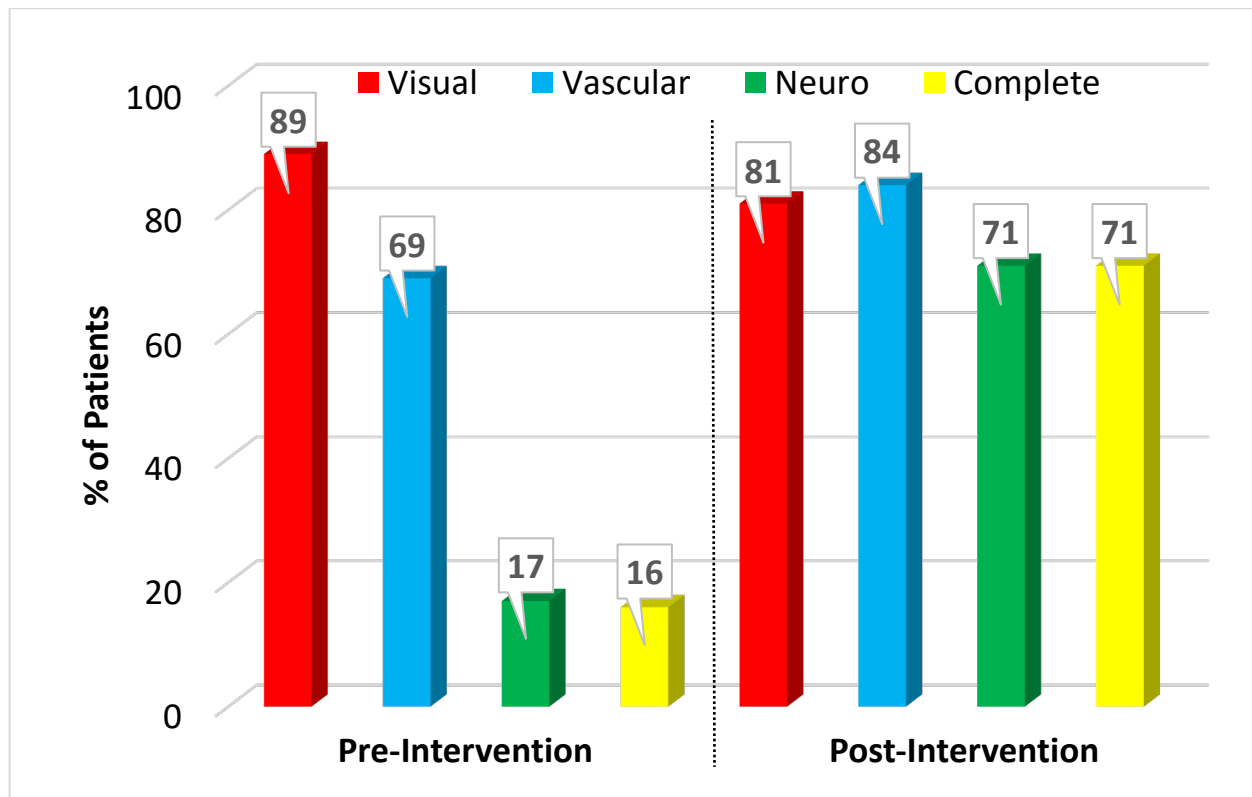

**Figure S2.** Run chart showing monthly ADFE compliance: pre- & post-intervention

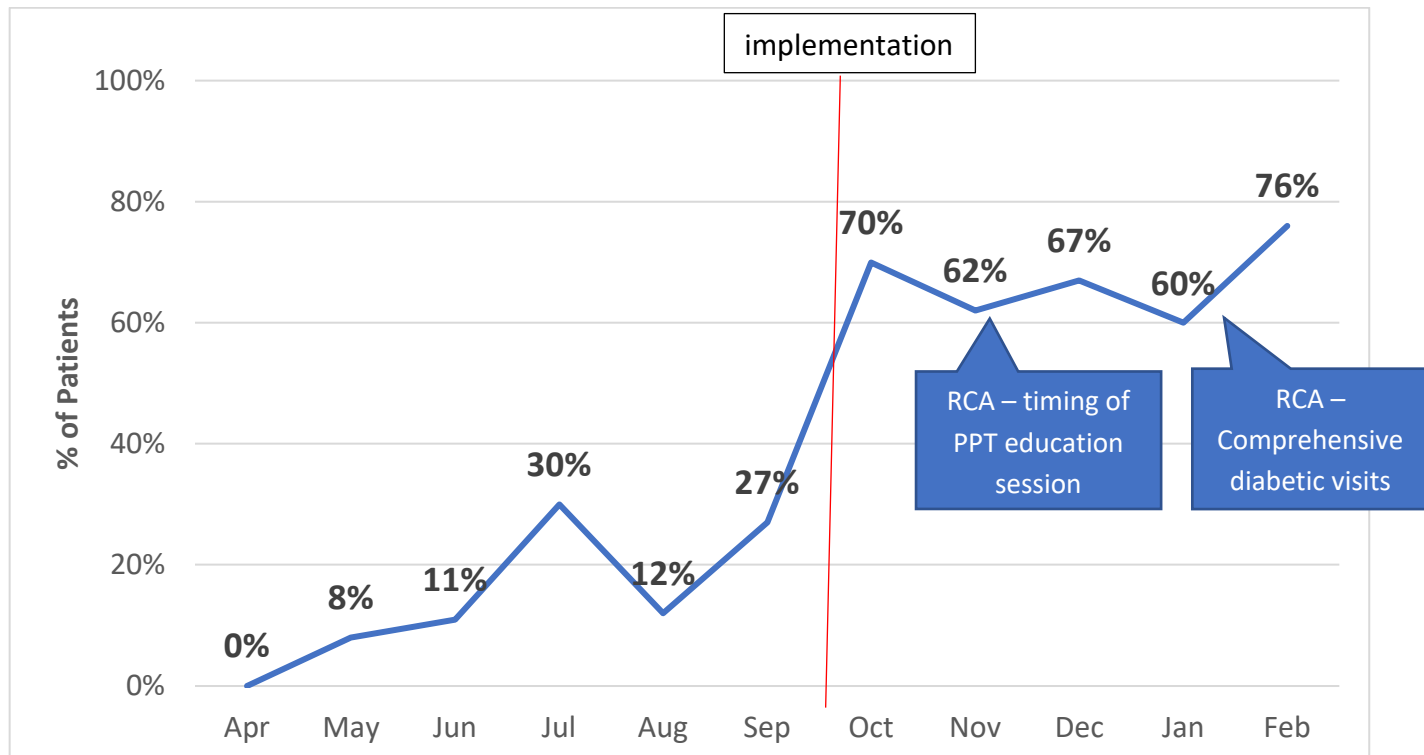

## Appendix A. Pre- & Post-PowerPoint Education Session Quiz Questions

### Pre-/Post-Test

- 1.) What are the 3 main components of a Diabetic Foot Exam?
  - a.) Visual, Temperature, & Color
  - b.) Visual, Vascular, & Sensory
  - c.) Vascular, Pulses, & Temperature
- 2.) How often does the ADA recommend Diabetic Foot Exam Screenings?
  - a.) at least annually and PRN with abnormalities
  - b.) biweekly
  - c.) at every visit
- 3.) **True or False:** Foot exams can prevent wound formation and lead to early detection of complications related to diabetes.
- 4.) **True or False:** Physical exam findings for all diabetic foot exams should be documented in the Podiatry section within the examination tab (i.e. Examination > Podiatry)
- 5.) **True or False:** Diabetic foot exam completion must also be documented under Preventative Medicine > Medical Home, including date of exam.
- 6.) The diabetic foot exam procedure code is. . .
  - a.) 99213
  - b.) 99204
  - c.) G9226
